# Supplementary material for: Multifunction waveform generator for EM receiver testing
Source: Copernicus journal article supplement (doi:10.5194/gi-2017-43), 2017-08-22
Supplement: Supplementary file [file gi-2017-43-AC2-supplement.pdf]

# 1 Multifunction waveform generator for EM receiver 2 testing

3 Kai Chen, Sheng Jin, Ming Deng

4 China University of Geosciences, Beijing, China

5 *Correspondence to:* Kai Chen (ck@cugb.edu.cn)

6 **Abstract.** In many electromagnetic (EM) methods, such as magnetotelluric, spectrum induced  
7 polarization, time domain induced polarization, and controlled source audio magnetotelluric methods,  
8 it is important to evaluate and test the EM receivers during their development stage. To assess the  
9 performance of the developed EM receivers, controlled synthetic data that simulate the observed  
10 signals in different modes are required. **In controlled source audio magnetotelluric (CSAMT) and**  
11 **spectrum induced polarization (SIP) mode testing, the waveform generator should use the GPS time as**  
12 **the reference for repeating schedule.** Based on our testing, the frequency range, frequency precision,  
13 and time synchronization of the currently available function waveform generators in the market are  
14 deficient. This paper presents a multifunction waveform generator with three waveforms: 1) a  
15 wide-band low-noise electromagnetic field signal to be used for magnetotelluric, audio-magnetotelluric,  
16 and long period magnetotelluric studies; 2) a repeating frequency sweep square waveform for CSAMT  
17 and SIP studies; and 3) a “positive-zero-negative-zero” signal that contains primary and secondary  
18 fields for time domain induced polarization studies. In this paper, we provide the principles of the  
19 above three waveforms along with a hardware design for the generator. Furthermore, testing of the EM  
20 receiver was conducted with the waveform generator, and the results of the experiment were compared  
21 with those calculated from the simulation and theory in the frequency band of interest.

22

23 **Keywords:** Multifunction waveform generator; EM receiver; pseudo-random binary sequence; chopper;  
24 signal synthesiser

## 25 **1 Introduction**

26 Electromagnetic (EM) methods are successfully used in a variety of applications, including metal ore  
27 investigations, ground water explorations, hydrocarbon prospecting, volcano research, and deep earth

28 research (Wei et al., 2010; Key, 2003). In these applications, EM methods are used to measure natural  
29 or controlled source signals, and then to interpret the underground electrical structure using data  
30 processing and inversion techniques (Osinowo and Olayinka, 2012; Scheuermann, 2016). There are  
31 many EM methods in use today; however, in this paper we are interested in magnetotelluric (MT)  
32 (Cagniard, 1953), controlled source audio magnetotelluric (CSAMT) (Sandberg and Hohmann, 1982),  
33 spectrum induced polarization (SIP) (Johnson, 1984), and time domain induced polarization (TDIP)  
34 (Marshall and Madden, 1959) methods. The requirements for field instruments supporting these  
35 methods include high resolution, large exploration depth, low cost, and high efficiency field data  
36 acquisition. All of the above EM methods are dependent on the quality of the field data acquired by the  
37 EM instrument. Therefore, the specifications of the EM receiver are of particular importance for high  
38 quality EM prospecting. The current EM receivers, such as the V8 receiver from Phoenix Geophysics  
39 (PhoenixGeophysics, 2017), GDP32 from Zonge (Zonge, 2017), ADU-07e from Metronix (Metronix,  
40 2017), and KMS-820 from KMS (KMS, 2017), are all specified as being multifunction, multi-channel,  
41 and easy to use with low noise levels and low clock drift errors.

42 **EMR6 is a new multifunctional EM receiver for deep metal mineral exploration EM survey, which was**  
43 **developed by China University of Geosciences (Beijing) (CUGB) and which supports the audio**  
44 **magnetotelluric (AMT), MT, CSAMT, SIP, and TDIP methods on the surface and in tunnels.** In  
45 addition, the MT function includes the audio magnetotelluric (AMT), magnetotelluric, and long period  
46 magnetotelluric (LMT) methods in different frequency ranges. During the development of the  
47 instrument, the receiver was tested with each method module after the electrical parameters were  
48 characterised. **For the realization of a multi-frequency EM receiver, (Chen et al., 2010) developed an**  
49 **automatic testing system based on pseudo-random signals. For MT receiver performance evaluation,**  
50 **(He et al., 2011) conducted a series process method with high efficiency.** For the MT method module  
51 test (Ge et al., 2016), a pseudorandom bit sequence (PBRs) module was designed, which included a  
52 white noise source that simulated a broadband natural source MT signal in the  $5 \times 10^{-4}$  Hz to 14 kHz  
53 frequency range, which was suitable for the AMT and MT mode.

54 **However,** the lower frequency range for the LMT test was deficient. For the CSAMT and SIP mode  
55 tests, which require a repeating frequency sweep square waveform, the test signal should be time  
56 synchronized and repeated. There are function waveform generators available in the market, such as the  
57 Agilent 33250A, which support multiple broadband waveforms; however, the frequency precision and

58 time synchronization error in these generators are deficient. For example, in the TDIP mode test, the  
59 arbitrary waveform function is suitable, but the time synchronization error is deficient.

60 In this paper, we describe a multifunction waveform generator. The details of the waveform generator,  
61 including the system design and the hardware principles, are discussed. Section II begins by describing  
62 the requirement of the three types of waveforms. Next, we discuss the hardware principle design in  
63 Section III. Section IV describes the test results to confirm the function of the waveform generator. In  
64 Section V, the discussion and the specification comparison table are presented.

## 65 2 System design

66 The multifunction waveform generator is designed to output three types of waveforms: white noise for  
67 MT (AMT/MT/LMT), a repeated swept square waveform for CSAMT and SIP modes, and a “PNZN”  
68 waveform for the TDIP mode.

69 The MT method consists of three branches – AMT, standardised MT, and LMT – and these branches  
70 differ in terms of the exploration depths of interest and the effective frequency ranges. Figure 1  
71 illustrates the frequency ranges applicable to the three branches of the MT method. The high frequency  
72 band in the AMT method is from 10 kHz to 0.1 Hz, which spans five decades; the frequency band in  
73 the standardised MT method is from 320 Hz to  $5 \times 10^{-4}$  Hz, which spans approximately six decades;  
74 the frequency band in the LMT method is from 1 Hz to  $1 \times 10^{-5}$  Hz, which spans approximately five  
75 decades. A PRBS generator is the best choice for generating broadband signals (Amrani et al., 1998).  
76 The highest frequency is determined by the width of the smallest encoding, and the lowest frequency  
77 depends on the length of the PRBS. According to the three different frequency band modes, the length  
78 of the PRBS must be greater than  $1 \times 10^6$ . Therefore, we designed a PRBS with length  $2^N - 1$ , where N  
79 equals 24 and the length is 16 M. By changing the smallest code width of the PRBS, it was easy to  
80 meet the three MT modes operating in different frequency ranges.

81

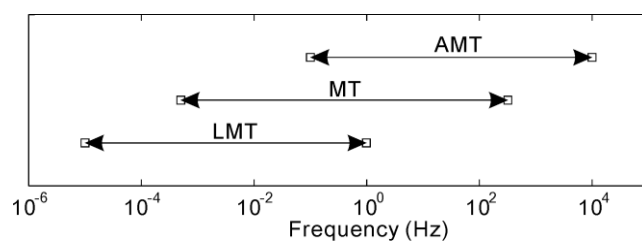

82

83 **Figure 1: Three MT sounding methods with different frequency ranges.**

84 The formal definition of the PRBS is:

$$85 D = X^{24} + X^7 + X^2 + X + 1. \tag{1}$$

86 The length of the sequence is 16 M. The smallest code width, which changes for different fundamental  
 87 frequencies, can be selected from 10  $\mu$ s, 1 ms, and 100 ms. Table 1 lists the parameters for the three  
 88 modes.

89

90 **Table 1. PRBS Parameters for three MT modes.**

| Mode | Length | Smallest code width | Available frequency range |
|------|--------|---------------------|---------------------------|
| AMT  | 16 M   | 10 $\mu$ s          | 100 kHz to 6 mHz          |
| MT   | 16 M   | 1 ms                | 1 kHz to 60 $\mu$ Hz      |
| LMT  | 16 M   | 100 ms              | 10 Hz to 0.6 $\mu$ Hz     |

91

92 The designed frequency range for the CSAMT method is from approximately 0.1 Hz to 10 kHz. The  
 93 programmable frequency stepping schedule is according to the typical CSAMT frequency stepping  
 94 schedule used in the field when working with the V8 receiver from Phoenix Geophysics. The frequency  
 95 stepping schedule contains 41 frequency points, and lasts for 50 min. Figure 2 presents the typical  
 96 frequency stepping schedule plotted on a log scale, and two frequency points in a double frequency  
 97 range as an approximate average in the log scale. The 41 frequency points cover four decades and  
 98 extend from 9,600 Hz to 0.9375 Hz. All frequency points are derived from a 12.288 MHz high-stability  
 99 clock source. To increase the lower frequency signal-to-noise ratio (SNR), the length of the stacking  
 100 time of the lower frequencies is longer than that of the higher frequencies. The longest stacking time is  
 101 323 s for 1.25 Hz in the low frequency band, and the shortest is 40 s in the high frequency band.

102

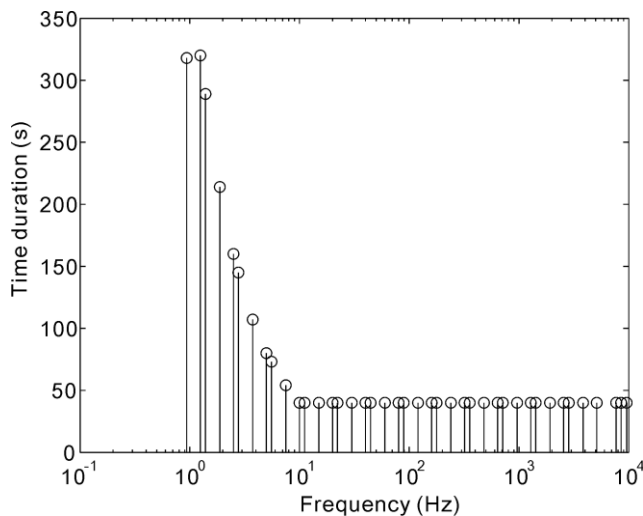

103

104 **Figure 2: Stacking time length for a typical CSAMT frequency stepping schedule.**

105 The designed frequency range for the SIP method is from 128 Hz to 0.0625 Hz. The frequency stepping  
 106 schedule is the same as the typical SIP step schedule used in the field when working with the V8  
 107 receiver from Phoenix Geophysics. Figure 3 shows a typical frequency stepping schedule plotted on a  
 108 log scale, and frequency stepping by double. There are 12 frequency points, each of which last for 15  
 109 min, and the 12 points cover approximately four decades and extend from 128 Hz to 0.0625 Hz. As was  
 110 the case in the CSAMT mode, all frequency points could be derived from a 12.288 MHz clock source.  
 111 To increase the lower frequency SNR, a longer stack time was used in the lower frequency band versus  
 112 that used in the higher frequency band. The longest stack time was 273 s in the low frequency band at  
 113 1.25 Hz, and each point lasted for 50 s in the high frequency band.

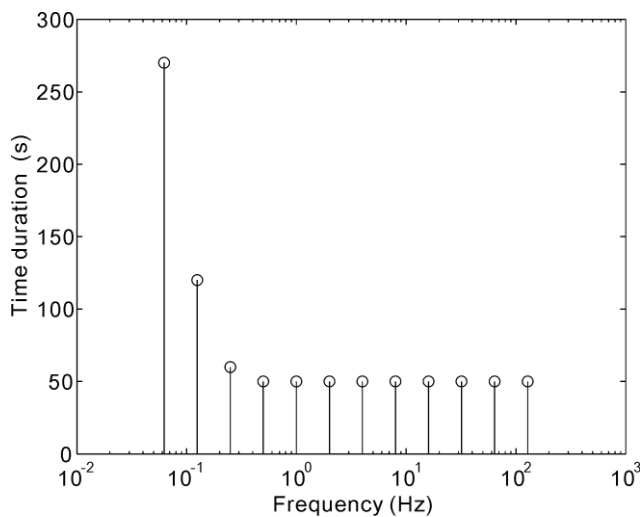

114  
 115 **Figure 3: Stack time length for a typical SIP frequency stepping schedule.**

116  
 117 The PZMZ waveform for the TDIP module is shown in Fig. 4 and consists of four phases: positive ON  
 118 time, OFF time, negative ON time, and OFF time. The duty ratio is 1:1. In the figure, T denotes the  
 119 four-phase period and the width of the pulse is T/4. The term A denotes the amplitude of the primary  
 120 electrical field, B denotes the maximum amplitude of the secondary electrical field, and A + B denotes  
 121 the total electrical field. The self-potential and other disturbances are not considered in the figure.  
 122

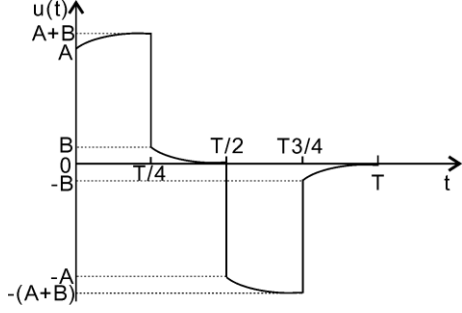

123  
124 **Figure 4: PZNZ waveform from a theoretical simulation.**

125

$$126 \quad u_1(t) = \begin{cases} A, & 0 \leq t < T/4 \\ 0, & T/4 \leq t < T/2 \\ -A, & T/2 \leq t < 3T/4 \\ 0, & 3T/4 \leq t < T \end{cases} \quad (2)$$

$$127 \quad u_2(t) = \begin{cases} B - Be^{-t/\tau}, & 0 \leq t < T/4 \\ Be^{-(t-T/4)/\tau}, & T/4 \leq t < T/2 \\ Be^{-(t-T/2)/\tau} - B, & T/2 \leq t < 3T/4 \\ -Be^{-(t-3T/4)/\tau}, & 3T/4 \leq t < T \end{cases}, \quad (3)$$

128 where  $u_1(t)$  and  $u_2(t)$  denote the primary and secondary electrical fields, respectively, and the exponent  
129 attenuation curve refers to the secondary electrical field.

130

131

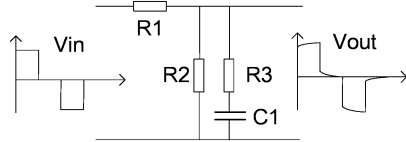

132  
133 **Figure 5: Schematic of the PZNZ waveform generator.**

134 Figure 5 shows a schematic of the circuit used to generate the PZNZ waveform, which contains both  
135 primary and secondary electrical fields. The resistor-capacitor (RC) network transforms the PZNZ ( $V_{in}$ )  
136 waveform into a PZNZ waveform ( $V_{out}$ ) with the secondary electrical field.

137

$$138 \quad A = \frac{R_3 // R_2}{R_1 + R_3 // R_2} K \quad (4)$$

$$139 \quad B = \frac{R_3 // R_2}{R_1 + R_3 // R_2} K - \frac{R_2}{R_1 + R_2} K \quad (5)$$

$$140 \quad \tau = R_3 C_1 \quad (6)$$

141

142 The amplitude of  $V_{in}$  is  $\pm K$ . A and B used in Eqs. (2) and (3) can be calculated from Eqs. (4) and (5).

143 The time constant ( $\tau$ ) is given by Eq. (6).

## 144 **3 Hardware principle**

### 145 **3.1 Block diagram**

146 Figure 6 presents a block diagram of the waveform generator, which has the advantages of automation,  
147 ease of use, high phase precision, and low power. As shown in the figure, the hardware consists of an  
148 input switch, microcontroller unit (MCU), GPS module, complex programmable logic device (CPLD),  
149 compensated microprocessor crystal (MCXO), real time clock (RTC), chopper, shaper, multiplexer,  
150 power conversion circuit, and built-in Li-ion battery package. *DS3231 from Maxim Integrated is a*  
151 *low-cost, extremely accurate RTC with an integrated temperature compensated crystal oscillator*  
152 *(TCXO) and crystal. It has the advantages of high integration level, low power, and ease of use. The*  
153 *low-power 8-bit micro-controller MSP430G2553 from Texas Instruments was used as the MCU and*  
154 *5M80ZE64 from Altera was used as the CPLD.* The input switch is used to change the work mode  
155 without configuring the external complicated parameters. The LED is used to indicate the working  
156 status. The different work modes output different LED flash patterns. The GPS module is LEA-6T  
157 from U-blox, which provides a high precision time pulse per second with low power consumption. The  
158 MCXO has the specifications of high stability clock source (12.288 MHz) ( $\pm 30$  ppb) and low power  
159 consumption (3.3 V & 12 mA). To lock the GPS, the MCU receives the time information from the GPS  
160 module and writes to the RTC. The CPLD is used to implement a frequency divider, logic operator,  
161 PPS lock, and tracking. The RTC is the time counter used for circulation of the frequency stepping  
162 schedule. The chopper circuit chops a high precision DC reference into a bipolar square waveform  
163 under the control of the CPLD. The shaper generates the TDIP PZMZ waveform. Moreover, the sum of  
164 the primary and secondary field signals is also provided as output. The multiplexer is controlled by the  
165 MCU to select either the chopper or the shaper output. The power module converts the Li-ion battery  
166 (11.1 V and 10 Ahr) voltage to digital power at 3.3 V and analogue power at  $\pm 3$  V.

167

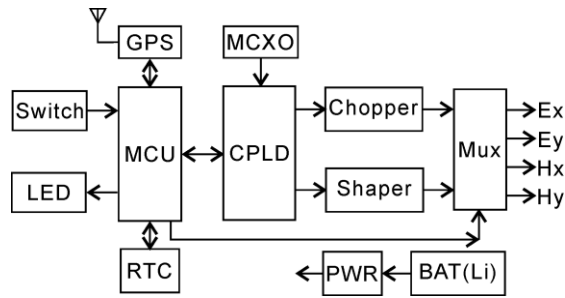

168

169

**Figure 6: Block diagram of the multifunction waveform generator circuit.**

170

When the MT mode is selected, the MCU controls the CPLD to generate two independent PRBS. The outputs Ex and Hy share one PRBS, whereas Ey and Hx share another PRBS. The two PRBSs are different for different phases. The chopper circuit converts the 3.3-V CMOS PRBS into a bipolar  $\pm 10$ -mV square wave for Ex and Ey. The amplitude of Hx and Hy is  $\pm 100$  mV. The MCU uses the multiplexer output to select the chopper output. Based on the different modes (AMT/MT/LMT), the output selected by the input switch and the smallest code width of the PRBS is changed. To decrease the power consumption, the GPS module is powered down during the MT mode.

177

When the CSAMT mode is selected, the MCU reads the GPS time information and writes to the RTC. The MCU controls the CPLD division factor according to the frequency stepping schedule. The CPLD divides the clock source (12.288 MHz) to the target frequency step by step. The divider is triggered by the PPS from the GPS module. The 41 frequency point clock signal drives the chopper circuit to generate a bipolar square waveform. All frequency stepping schedules start from the reference time base of 00:00:00 and repeat from high frequency to low frequency. For example, after the power is turned on and the GPS is locked, the current time is 02:20:00, the period of frequency stepping schedule is 50 min, the residual time is 40 min, the first output signal is the No. 40 frequency point (1.25 Hz), and the output is the rest 10 min of the current schedule. The frequency stepping schedule is repeated continually.

187

The procedure in the SIP mode is the same as that described above for the CSAMT module for the step schedule with time synchronization. A typical frequency stepping schedule period is 15 min, and contains 12 frequency points.

190

When the TDIP mode is selected, the RTC time is locked to the GPS module and the CPLD generates pulse with 2-s width synchronization as the PPS from the GPS module to drive the shaper circuit. The reference time base is 00:00:00, and the typical period is 8 s with duty ratio 1:1.

193

For locking the GPS time to the local RTC, the MCU obtains the time information from the GPS



194 module and writes it to the RTC. In the CSAMT, SIP, and TDIP modes, the MCU must know the  
195 current time before it can switch the repeating schedule.

### 196 3.2 Clock source

197 In accordance with the high precision phase requirement from the CSAMT and SIP modes, an  
198 integrated U-blox GPS module and MCXO were selected as the high stability clock source. The  
199 LEA-6T module series is a family of stand-alone GPS receivers that feature the high performance  
200 U-blox 6 timing engine. The accuracy of the time pulse signal in the LEA-6T is approximately 30 ns,  
201 and the time-to-first-fix is 29 s. The clock module is an ultra-high stability MCXO from Vectron  
202 MX-503 with an accuracy of  $\pm 30$  ppb in a temperature range of  $-20$ – $75$  °C. The power consumption of  
203 the module is 12 mA at 3.3 V. For example, to generate the clock ( $f = 9,600$  Hz) in the CSAMT mode,  
204 the MCU sets the division factor to 1280 and the CPLD divides the clock signal, which is triggered by  
205 the PPS from the GPS module. After 50 PPS counts, the MCU sets the division factor to 1,600, and the  
206 output clock frequency changes to 7,680 Hz. The above steps are then repeated, and each division is  
207 triggered by the PPS. There is a one-second pause between each switch divider for the CPLD to  
208 synchronize with the MCU. The CPLD is controlled by an MCU with a serial-peripheral interface.

209 In the SIP mode, a clock signal with an accuracy of  $\pm 30$  ppb will drift by  $27 \mu\text{s}$ , while the entire  
210 circulation lasts 15 min. The time drift error will cause a 21-mrad phase error when the frequency of  
211 the transmitter is set to 128 Hz. For high phase precision, the frequency error of the switching clock  
212 signal must be as low as possible.

### 213 3.3 Chopper circuit

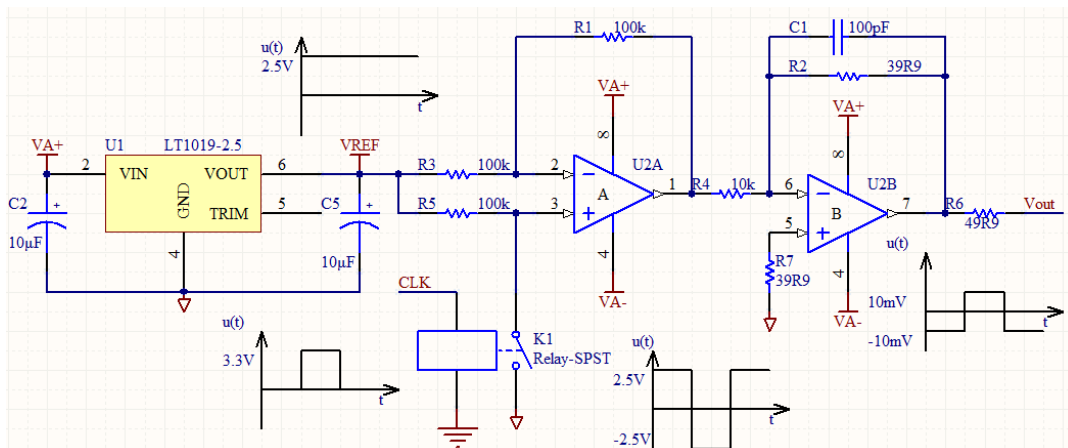

214  
215 **Figure 7: Schematic of the chopper circuit (E channel).**

216 Figure 7 shows the schematic of the chopper circuit, which chops a high precision DC reference  
 217 voltage into a bipolar square waveform driven by the switching clock. The circuit contains voltage  
 218 references, a relay-SPST, and an amplifier. The voltage reference LT1019-2.5 (from Linear Technology)  
 219 used is a 2.5 V high precision DC reference. The relay is driven by the switching clock, which is a 3.3  
 220 V CMOS square waveform. **The switching clock is divided from the above MCXO.** The switching  
 221 clock control the connection U2 Pin3 and GND. The output from U2 Pin 1 is a bipolar square wave  
 222 with an amplitude of 2.5 V. The component U2B is an attenuator and low pass filter, and the output  
 223 decreases from 5 Vpp to 20 mVpp for the E channel. The bandwidth is limited to 100 kHz. The  
 224 amplitude of the H channel is 200 mVpp, which is different from the gain of U2B.

### 225 3.4 Shaper circuit

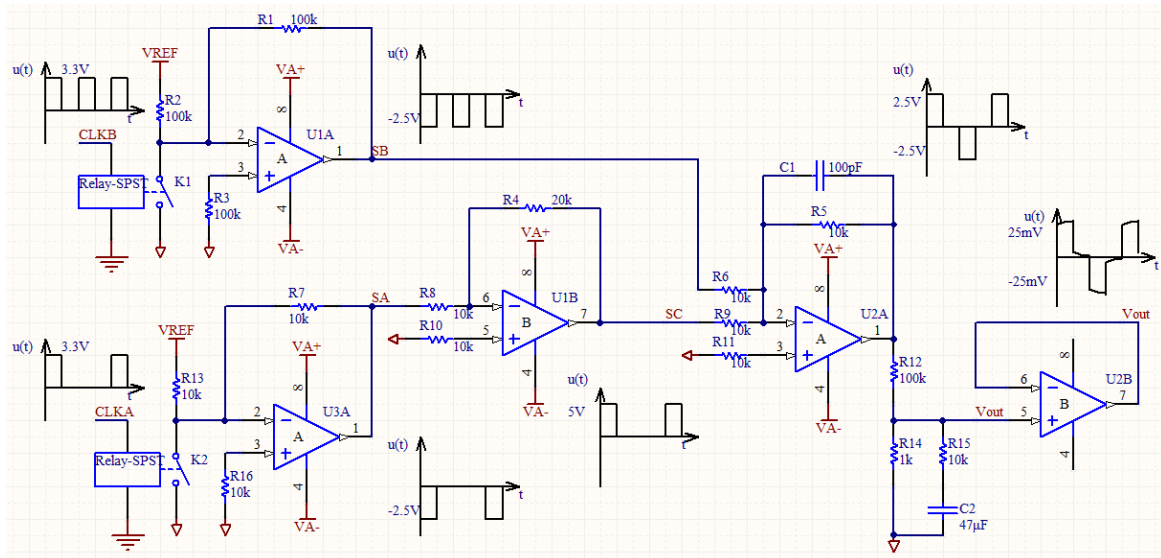

226  
 227 **Figure 8: Schematic of the shaper circuit.**

228 A schematic of the shaper circuit is shown in Fig. 8. The shaper circuit shapes the clock output from the  
 229 CPLD into a PZMZ waveform. In the shaper circuit, there are two channel clock sources (CLKA and  
 230 CLKB) and one output (Vout). The CLKA and CLKB outputs are set as different frequencies such that  
 231 the frequency of CLKA is double the frequency of CLKB, and the duty ratio of CLKB is 1:3. The  
 232 width of each pulse is 2 s. **The amplifiers U1A and U3A are both used as chopper circuits**, which chop  
 233 the DC reference to the square waveform. The clock is transformed into a square waveform with an  
 234 amplitude of 2.5 V. The amplifier U1B is set with a gain of  $-2$ . The amplifier U2A adds nodes SB and  
 235 SC. The waveform at node SD is a bipolar PZMZ waveform. The components R12, R14, R15, and C2

236 constitute an RC network to generate the PZMZ waveform based on the principles described earlier.  
237 The amplitude at the output of the shaper is approximately 50 mVpp.

## 238 4 Test

### 239 4.1 MT mode

240 We used the developed multifunction waveform generator to test our multifunction EM receiver  
241 (EMR6). The output of the multifunction waveform generator was connected to the input of the EMR6,  
242 which works in three sequential modes: 30 min for AMT mode, 24 h for MT mode, and 72 h for LMT  
243 mode. All raw data was processed using the white noise method by the MT data processing software  
244 (SSMT2000) from Phoenix Geophysics. The results of the data processing are shown in Fig. 9. The  
245 apparent resistivity and impedance phase are present across the entire nine-decade frequency range  
246 from  $1 \times 10^{-5}$  Hz to  $1 \times 10^4$  Hz. The theoretical simulation result of the apparent resistivity was 1,270  
247  $\Omega$  m, and the impedance phase was approximately  $0^\circ$ . When the experimental results were compared to  
248 those from the theoretical simulation, the bias error between the experiment results and theoretical  
249 value for the apparent resistivity was 1.5%.

250

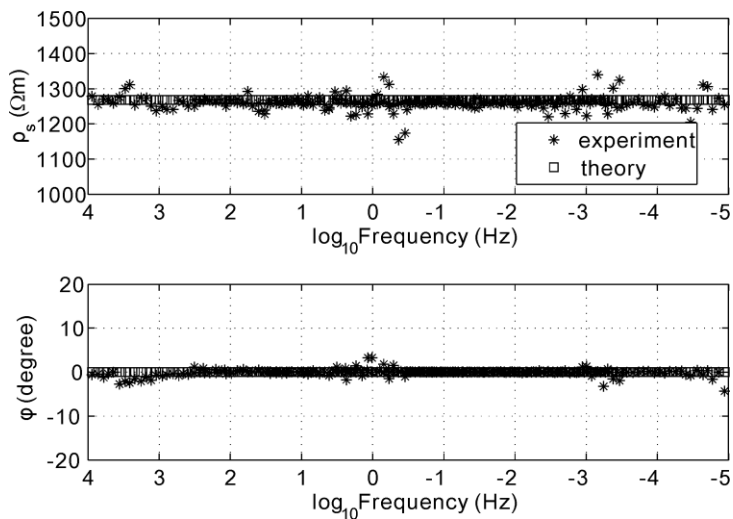

251

252 **Figure 9: Apparent resistivity and impedance phase results from the EMR6 testing. The upper subfigure**  
253 **shows the apparent resistivity curves, and the lower subfigure shows the impedance phase curves.**

254 The results of the experiment indicated that the multifunction waveform generator could test the MT  
255 receiver across the entire MT band, and the EMR6 receiver was shown to have a correct response in the  
256 target bands.

257 **4.2 TDIP mode**

258 To verify the TDIP waveform, the generator was switched to the TDIP mode and its output was  
259 connected to the EMR6 E channel input, and the EMR performs TDIP data acquisition during 2 min at  
260 2,400 Hz sample rate. Figure 10 shows the time series captured by the EMR6. The full waveform was  
261 recorded for the entire time series of the E1 channel, including the primary and secondary field  
262 waveforms. The amplitude was approximately 50 mVpp, and the “on” time and “off” time pulse widths  
263 were 2 s.

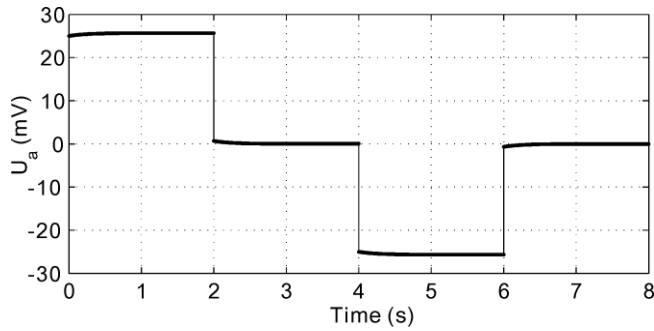

264  
265 **Figure 10: Time series in TDIP mode as captured by the EMR6.**

266 The chargeability was calculated by dividing the secondary field into nine windows. The offset time of  
267 the first window was 10 ms, and each window had a width of 8, 16, 32, 64, 128, 256, 512, 1024, and  
268 2048 sample points, respectively. Figure 11 shows a comparison between the measured results and  
269 those from the theoretical simulation. The chargeability was distributed from 0.7% to 9%. The results  
270 show that the output from the waveform generator during the experiment response was in good  
271 agreement with the theoretical output. The bias error of the nine windows was 0.8% between the  
272 measured results from the experiment and those from the theoretical simulation.

273

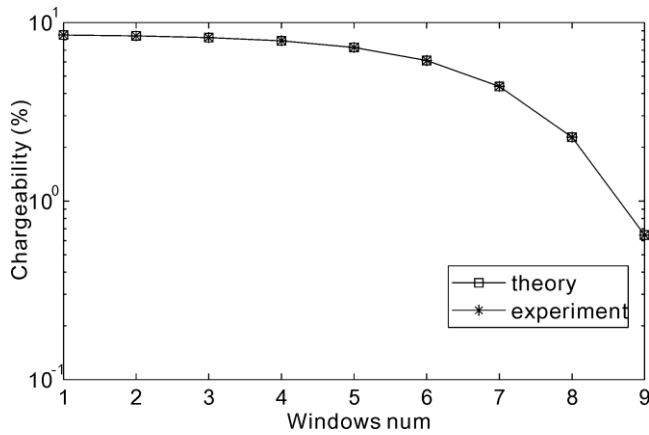

274  
275 **Figure 11: Comparison between the calculated results and the theoretical simulation results for TDIP mode.**

276 **4.3 SIP mode**

277 The EMR6 and waveform generator operated on the SIP mode. To simplify the experiment, the current  
278 data of the transmitter and a variety of geometric factors were not considered. The EMR6 recorded the  
279 frequency-swept square waveform for 15 min and calculated the amplitude of each target frequency.  
280 Figure 12 shows the 12 target frequencies from 128 Hz to 0.0625 Hz. The amplitudes measured in the  
281 experiment were approximately 12.74 mV and the phases were approximately 0°. The bias error  
282 between the experiment and theory was 0.5 % across the entire frequency range.

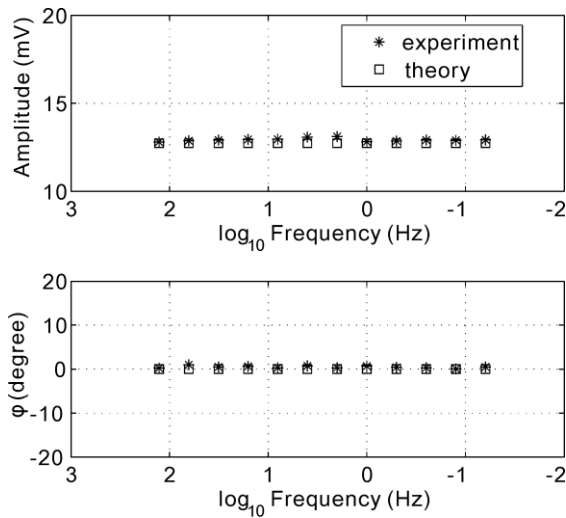

283  
284 **Figure 12: Comparison between the experimental results and the theoretical simulation results for the SIP**  
285 **mode.**

286 **4.4 CSAMT mode**

287 The EMR6 and waveform generator operated on the CSAMT mode and recorded the E- and H-channel  
288 swept square waveforms. The Cagniard apparent resistivity and impedance phase were calculated. The  
289 receiver recorded the swept frequency waveform for 50 min. Figure 13 shows the results calculated for  
290 the 41 target frequency points from 9,600 Hz to 0.9375 Hz. The apparent resistivity measured in the  
291 experiment was approximately 1,268 Ω m and the phase was approximately 0°. The bias error between  
292 the experiment and theory was 1.3% across the entire frequency range.

293

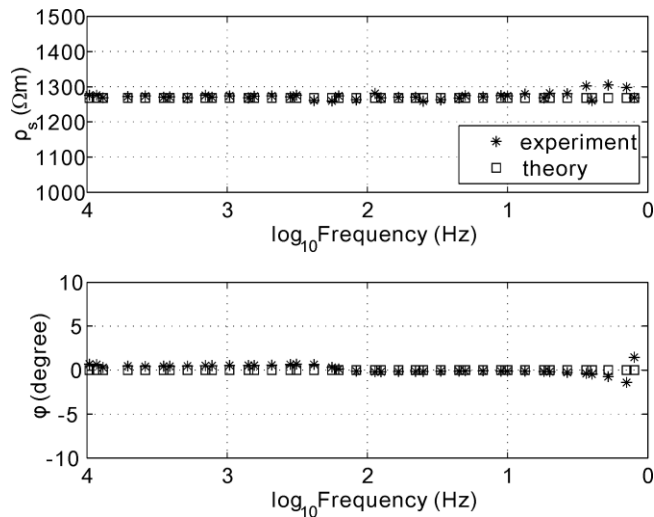

294

295 **Figure 13: Comparison between the calculated results and the simulation results for the CSAMT mode.**

296 **5. Discussion**

297 We developed a special multifunction waveform generator to meet the testing requirements of the  
 298 EMR6 receiver. The waveform generator supports a broadband low-noise pseudo-random binary  
 299 sequence (PRBS) for MT, repeating frequency sweep square waveform for CSAMT and SIP with a  
 300 programmable frequency step list, and “positive-zero-negative-zero” (PNZN) waveform containing  
 301 both primary and secondary fields for the TDIP mode. Moreover, additional requirements for the  
 302 waveform generator included: 1) ease of use, auto-repeat circulation of output according to the  
 303 scheduled frequency step list; 2) high precision phase and time synchronization; 3) low power  
 304 consumption for the LMT mode test, which has the capacity of the built in Li-ion battery that allows  
 305 for one week of operation.

306 Based on the results of the above experiment, Table 2 presents the comparison of the specifications of  
 307 the developed multifunction waveform generator and the Agilent 33510B function waveform generator.

308 The presented results indicate that Agilent 33510B is not suitable for EM receiver testing. The  
 309 developed multifunction waveform generator is a better signal source for this purpose.

310

311 **Table 2. Specification comparison with Agilent 33510B.**

| Specifications | Agilent 33510B                                   | Newly developed multifunction waveform generator |
|----------------|--------------------------------------------------|--------------------------------------------------|
| Function       | Sine/square/ramp/pulse/triangle/PRBS/white noise | PRBS/Frequency sweep/PZNZ                        |
| Channels       | 2                                                | 4 (Ex/Ey/Hx/Hy)                                  |

|           |                                      |                                      |
|-----------|--------------------------------------|--------------------------------------|
| Time sync | Internal timer or Ext Trig connector | GPS                                  |
| PRBS      | 1m bps~50 M bps                      | 10 $\mu$ Hz~100 kHz                  |
| Power     | AC 100–240 V                         | Built-in rechargeable Li-ion battery |

312 Total harmonic distortion (THD) is another important factor determining the performance of the EM  
 313 receiver. We have used a low distortion signal generator (DS360) from Stanford Research Systems as a  
 314 pure signal source. This function is not contained in the current work, and it may be realized in a future  
 315 development.

316 **6. Conclusion**

317 The performance of the existing commercial function/arbitrary waveform generator is deficient with  
 318 regard to time synchronization and waveform requirements. The multifunction waveform generator  
 319 described in this paper was found to be useful for conducting EM receiver testing for multiple EM  
 320 methods. The results of the testing show that the multifunction waveform generator could provide three  
 321 mode signals containing independent broadband signals with different spectral characteristics, white  
 322 noise, a repeating swept square waveform, and a PZMZ waveform consisting of primary and secondary  
 323 fields. The apparent resistivity and impedance phase of the broadband white noise source was very flat  
 324 across a wide frequency band. The theoretical design of the TDIP waveform was shown to have a  
 325 correct response. In the SIP and CSAMT modes, the results of the experiment and theoretical  
 326 simulation were a close match. In addition, the generator had other advantages in that it was easy to use  
 327 and had low power consumption.

328 Furthermore, various parameters, such as the programmable frequency step schedule in the CSAMT  
 329 and SIP modes and the pulse width of the TDIP waveform, are configurable by the user through the  
 330 hardware interface or by loading the memory.

331 **Author Contributions**

332 Kai Chen developed the required hardware and software. Sheng Jin created the overall design and  
 333 performed the tests. Ming Deng was the chopper and shaper circuit technology consultant.

334 **Competing Interests**

335 The authors declare that they have no conflict of interest.

336 **Acknowledgments**

337 General funding was provided by the National High Technology Research and Development Program  
338 of China (2014AA06A603), National Science Foundation of China (61531001), Central University  
339 Fundamental Research Project of the Ministry of Education (2652015403), and Key Development  
340 Program of China (2016YFC0303100). We are thankful for the data processing software from Phoenix  
341 Geophysics. We would also like to thank Editage [[www.editage.cn](http://www.editage.cn)] for their English language editing  
342 services.

343 **References**

344 Amrani, M. E. H., Dowdeswell, R. M., Payne, P. A., and Persaud, K. C.: Pseudo-random binary  
345 sequence interrogation technique for gas sensors, *Sensor Actuat B-Chem*, 47, 118–124, 1998.

346 Cagniard, L.: Basic theory of the magneto-telluric method of geophysical prospecting, *Geophysics*, 18,  
347 605–635, 1953.

348 **Chen, R.J., Yao, H.C., and Liu, S.L.: Automatic testing system of pseudo-random multi-frequency**  
349 **instrument receiver. Ref. No: CN200910044457, Year: 03/2010.**

350 Ge, S. C., Deng, M., Chen, K., and Shi, X. Y.: Broadband signal generator for the approximation of a  
351 magnetotelluric source for indoor testing, *J Geophys Eng*, 13, 612–621, 2016.

352 **He, Z.X., Chen, R.J., Liu, X.J., L., and He, L.F.: Magnetotelluric instrument performance evaluation**  
353 **method. Ref. No: CN200910237810, Year: 05/2011.**

354 Johnson, I. M.: Spectral induced polarization parameters as determined through time-domain  
355 measurements, *Geophysics*, 49, 1984.

356 Key, K. W.: Application of broadband marine magnetotelluric exploration to a three-dimensional salt  
357 structure and a fast-spreading ridge, Ph.D. thesis, University of California, San Diego, 2003.

358 KMS: [http://www.kmstechnologies.com/kms\\_company\\_overview.html](http://www.kmstechnologies.com/kms_company_overview.html), 2017, last access:1 January  
359 2017.

360 Marshall, D. J. and Madden, T. R.: Induced Polarization, a study of its causes, *Geophysics*, 24, 790,  
361 1959.

362 Metronix: <http://www.metronix.de/metronix/index.php>, 2017, last access:1 January 2017.

363 Osinowo, O. O. and Olayinka, A. I.: Very low frequency electromagnetic (VLF-EM) and electrical



364 resistivity (ER) investigation for groundwater potential evaluation in a complex geological terrain  
365 around the Ijebu-Ode transition zone, southwestern Nigeria, *J Geophys Eng*, 9, 374–396, 2012.

366 Phoenix Geophysics: <http://www.phoenix-geophysics.com/products/receivers/v8/>, 2017, last access:1  
367 January 2017.

368 Sandberg, S. K. and Hohmann, G. W.: Controlled-source audiomagnetotellurics in geothermal  
369 exploration, *Geophysics* 47, 100–116, 1982.

370 Scheuermann, A.: Electric and electromagnetic measurement methods in civil and environmental  
371 engineering. *J Geophys Eng*, 13, E1–E2, 2016.

372 Wei, W., Jin, S., Ye, G., Deng, M., Jing, J., Unsworth, M., and Jones, A. G.: Conductivity structure and  
373 rheological property of lithosphere in Southern Tibet inferred from super-broadband magnetotelluric  
374 sounding, *Sci China Earth Sci*, 53, 189–202, 2010.

375 Zonge: <http://zonge.com/instruments-home/instruments/receivers/>, 2017, last access:1 January 2017.
